# Supplementary material for: Prevalence and staging of non-alcoholic fatty liver disease among patients with heart failure with preserved ejection fraction
Source: PubMed Central journal article supplement (PMC7381602; doi:10.1038/s41598-020-69013-y), 2020-07-24
Supplement: 41598_2020_69013_MOESM1_ESM.pdf [file 41598_2020_69013_MOESM1_ESM.pdf]

**Prevalence and Staging of Non-Alcoholic Fatty Liver Disease Among Patients with Heart Failure with Preserved Ejection Fraction**

Alexandria Miller MD\* (2), Jennifer McNamara (3), Scott L. Hummel MD, MS (3, 4), Matthew C. Konerman MD (3), Monica A. Tincopa MD MSc (1)

- (1) Division of Gastroenterology and Hepatology, Department of Internal Medicine, University of Michigan, Ann Arbor, MI
- (2) Department of Internal Medicine, University of Michigan, Ann Arbor, MI
- (3) Division of Cardiovascular Medicine, Department of Internal Medicine, University of Michigan, Ann Arbor, MI
- (4) Ann Arbor Veterans Affairs Health System, Ann Arbor, MI

**Corresponding Author:** Monica A Tincopa, MD MSc; University of Michigan, 1500 East Medical Center Drive, Ann Arbor, MI 48109; tincopa@med.umich.edu

**Supplemental Table 1. Multivariable Correlated of NAFLD Among Overall Cohort of HFpEF Patients**

| <b>Variable</b>              | <b>Odds Ratio</b> | <b>95% CI</b> | <b>P Value</b> |
|------------------------------|-------------------|---------------|----------------|
| Age (per year)               | 0.99              | 0.96 -1.03    | 0.90           |
| Female Gender                | 1.46              | 0.65 – 3.27   | 0.35           |
| BMI (per kg/m <sup>2</sup> ) | 1.04              | 0.99 – 1.09   | 0.05           |
| Diabetes Mellitus            | 1.77              | 0.81 – 3.89   | 0.14           |
| LDL                          | 0.98              | 0.97 – 0.99   | <b>0.04</b>    |
| Severe HF                    | 1.63              | 0.71 – 3.71   | 0.24           |

**Supplemental Table 2. Baseline characteristics of patients with and without abdominal imaging**

| Variable                              | Overall<br>(n = 181) | Imaging<br>(n = 96) | No Imaging<br>(n = 85) | P Value       |
|---------------------------------------|----------------------|---------------------|------------------------|---------------|
| <b>Demographics</b>                   |                      |                     |                        |               |
| Age                                   | 70 (59 – 77)         | 69 (58 – 76)        | 71 (59 – 78)           | 0.2329        |
| Female Gender                         | 75 (41%)             | 39 (41%)            | 36 (42%)               | 0.8138        |
| Weight (kg)                           | 95.7 (79.4 – 115)    | 99.2 (80.6 – 114)   | 93.0 (78.7 – 114.9)    | 0.4462        |
| BMI (kg/m <sup>2</sup> )              | 35.1 (28.2 – 42.1)   | 35.1 (27.8 – 41.4)  | 34.9 (28.8 – 42.2)     | 0.8746        |
| <b>Clinical Characteristics</b>       |                      |                     |                        |               |
| Hypertension                          | 147 (81%)            | 78 (81%)            | 69 (81%)               | 0.9899        |
| Coronary Artery Disease               | 75 (41%)             | 39 (41%)            | 36 (42%)               | 0.8138        |
| Diabetes Mellitus                     | 87 (48%)             | 49 (51%)            | 38 (45%)               | 0.3945        |
| Obesity (BMI > 30 kg/m <sup>2</sup> ) | 125 (69%)            | 66 (69%)            | 59 (69%)               | 0.9234        |
| Atrial Fibrillation                   | 87 (48%)             | 44 (46%)            | 43 (50%)               | 0.5228        |
| Dyslipidemia                          | 119 (66%)            | 66 (69%)            | 53 (62%)               | 0.3654        |
| Statin Use                            | 123 (68%)            | 67 (70%)            | 56 (66%)               | 0.5738        |
| CKD (GFR < 60 mL/min)                 | 96 (53%)             | 50 (52%)            | 46 (54%)               | 0.7843        |
| Anemia                                | 83 (46%)             | 51 (53%)            | 32 (38%)               | <b>0.0370</b> |
| <b>Heart Failure Severity</b>         |                      |                     |                        |               |
| NYHA Class                            | n = 176              | n = 95              | n = 81                 |               |
| I-II                                  | 69 (39%)             | 33 (35%)            | 36 (44%)               | 0.1886        |
| III-IV                                | 107 (61%)            | 62 (65%)            | 45 (56%)               |               |
| BNP (pg/mL)                           | 117 (52.0 – 260)     | 102 (32.0 – 199)    | 165 (63.5 – 365)       | <b>0.0054</b> |
| <b>Echocardiography</b>               |                      |                     |                        |               |
| Ejection Fraction (%; n = 172)        | 60 (60 – 65)         | 60 (60 – 65)        | 60 (60 – 65)           | 0.3253        |
| IVS (mm; n = 160)                     | 10 (9.0 -12)         | 10 (9 -12)          | 10 (9 – 13)            | 0.6623        |
| Left Atrial Diameter (mm; n = 168)    | 46 (40 – 52)         | 45 (39 – 50)        | 47 (42 – 54)           | 0.0757        |
| RVSP (mm Hg; n = 116)                 | 47 (35 – 58)         | 42 (34 – 54)        | 52 (37 – 61)           | <b>0.0281</b> |
| E/A Ratio (n = 104)                   | 1.2 (0.8 – 1.9)      | 1.1 (0.8 – 1.8)     | 1.3 (0.9 – 2.0)        | 0.2288        |
| Diastolic Dysfunction (n = 91)        |                      | n = 49              | n = 42                 |               |
| Grade 0-1 or indeterminate            | 53 (58%)             | 31 (63%)            | 22 (52%)               | 0.2939        |
| Grade ≥ 2                             | 38 (42%)             | 18 (37%)            | 20 (48%)               |               |
| RV Systolic Dysfunction (n = 166)     | 23 (14%)             | 9 (10%)             | 14 (18%)               | 0.1507        |
| <b>Metabolic Evaluation</b>           |                      |                     |                        |               |
| Total Cholesterol (mg/dL; n = 156)    | 156 (124 – 184)      | 150 (122 – 173)     | 167 (127 – 197)        | <b>0.0361</b> |
| Triglycerides (mg/dL; n = 156)        | 124 (88 – 170)       | 106 (82 – 158)      | 136 (98 – 178)         | 0.0945        |
| HDL (mg/dL; n = 156)                  | 46 (38 – 59)         | 45 (36 – 54)        | 46 (40 – 60)           | 0.3851        |
| LDL (mg/dL; n = 156)                  | 76 (60-97)           | 71 (55 – 90)        | 84 (69 – 106)          | <b>0.0157</b> |
| A1c (%; n = 131)                      | 6.2 (5.7 – 7.6)      | 6.3 (5.7 – 7.6)     | 6.2 (5.8 – 7.6)        | 0.8701        |
| <b>Hepatic Evaluation</b>             |                      |                     |                        |               |
| Platelets (K/uL; n = 178)             | 215 (176 - 268)      | 216 (181 – 272)     | 214 (168 – 264)        | 0.6716        |
| AST (IU/L; n = 179)                   | 26 (20 – 31)         | 26 (20 – 32)        | 26 (20 – 31)           | 0.8170        |
| ALT (IU/L; n = 179)                   | 23 (17 – 32)         | 23 (17 – 30)        | 24 (17 – 32)           | 0.4831        |

|                                  |                    |                    |                    |        |
|----------------------------------|--------------------|--------------------|--------------------|--------|
| INR (n = 160)                    | 1.1 (1.0 – 1.4)    | 1.1 (1.0 – 1.3)    | 1.1 (1.0 – 1.5)    | 0.9154 |
| Total Bilirubin (mg/dL, n = 178) | 0.5 (0.4 – 0.8)    | 0.5 (0.4 – 0.8)    | 0.5 (0.3 – 0.8)    | 0.8589 |
| Albumin (g/dL, n = 178)          | 4.1 (3.9 – 4.4)    | 4.2 (3.8 – 4.4)    | 4.1 (3.9 – 4.4)    | 0.9918 |
| FIB-4 (n = 160)                  | 1.6 (1.2 – 2.5)    | 1.6 (1.1 – 2.3)    | 1.8 (1.2 – 2.7)    | 0.5902 |
| NFS (n = 159)                    | 0.33 (-0.72 – 1.4) | 0.32 (-0.82 – 1.4) | 0.34 (-0.50 – 1.4) | 0.7316 |

\*Continuous variables presented as median with interquartile range.
